# Supplementary material for: Single-cell sequencing reveals karyotype heterogeneity in murine and human malignancies
Source: PubMed Central journal article supplement (PMC4888588; doi:10.1186/s13059-016-0971-7), 2016-05-31
Supplement: 13059_2016_971_MOESM3_ESM.pdf [file 13059_2016_971_MOESM3_ESM.pdf]

**a**

| Cell ID | 1 | 2 | 3 | 4 | 5 | 6 | 7 | 8 | 9 | 10 | 11 | 12 | 13 | 14 | 15 | 16 | 17 | 18 | 19 | X | Group ID |
|---------|---|---|---|---|---|---|---|---|---|----|----|----|----|----|----|----|----|----|----|---|----------|
| 23      | 2 | 2 | 2 | 2 | 2 | 2 | 2 | 2 | 2 | 2  | 2  | 2  | 2  | 2  | 2  | 2  | 2  | 1  | 2  | 2 | 1        |
| 14      | 2 | 2 | 2 | 2 | 2 | 2 | 2 | 2 | 2 | 2  | 2  | 2  | 2  | 2  | 3  | 2  | 2  | 2  | 2  | 2 | 1        |
| 25      | 2 | 2 | 2 | 3 | 2 | 2 | 2 | 2 | 2 | 2  | 2  | 2  | 2  | 3  | 3  | 2  | 2  | 3  | 2  | 2 | 3        |
| 6       | 2 | 2 | 2 | 3 | 2 | 2 | 2 | 2 | 3 | 2  | 2  | 2  | 2  | 2  | 3  | 3  | 2  | 2  | 2  | 2 | 2        |
| 13      | 2 | 2 | 2 | 3 | 2 | 2 | 2 | 2 | 3 | 2  | 2  | 2  | 2  | 3  | 3  | 2  | 2  | 2  | 2  | 2 | 2        |
| 18      | 2 | 3 | 1 | 3 | 2 | 2 | 2 | 2 | 3 | 2  | 2  | 2  | 2  | 3  | 3  | 2  | 2  | 3  | 2  | 2 | 5        |
| 12      | 2 | 3 | 2 | 3 | 2 | 2 | 1 | 1 | 3 | 2  | 3  | 2  | 2  | 3  | 3  | 2  | 2  | 2  | 2  | 2 | 6        |
| 1       | 2 | 3 | 2 | 3 | 2 | 2 | 1 | 2 | 3 | 2  | 2  | 2  | 2  | 3  | 3  | 2  | 2  | 2  | 2  | 1 | 7        |
| 20      | 2 | 3 | 2 | 3 | 2 | 2 | 1 | 2 | 3 | 2  | 2  | 2  | 2  | 3  | 3  | 2  | 2  | 2  | 2  | 1 |          |
| 21      | 2 | 3 | 2 | 3 | 2 | 2 | 1 | 2 | 3 | 2  | 2  | 2  | 2  | 3  | 3  | 2  | 2  | 2  | 2  | 1 |          |
| 7       | 2 | 3 | 2 | 3 | 2 | 2 | 1 | 2 | 3 | 2  | 2  | 2  | 2  | 3  | 3  | 2  | 2  | 2  | 2  | 2 | 8        |
| 22      | 2 | 3 | 2 | 3 | 2 | 2 | 1 | 2 | 3 | 2  | 2  | 2  | 2  | 3  | 3  | 2  | 2  | 2  | 2  | 2 |          |
| 24      | 2 | 3 | 2 | 3 | 2 | 2 | 1 | 2 | 3 | 2  | 2  | 2  | 2  | 3  | 3  | 2  | 2  | 2  | 2  | 2 |          |
| 19      | 2 | 3 | 2 | 3 | 2 | 2 | 1 | 2 | 3 | 2  | 2  | 3  | 2  | 3  | 3  | 2  | 2  | 2  | 2  | 2 | 9        |
| 17      | 2 | 3 | 2 | 3 | 2 | 2 | 2 | 2 | 3 | 2  | 2  | 2  | 2  | 3  | 3  | 2  | 2  | 2  | 2  | 2 | 10       |
| 9       | 2 | 3 | 3 | 3 | 2 | 2 | 1 | 2 | 3 | 2  | 2  | 2  | 2  | 3  | 3  | 2  | 2  | 2  | 2  | 2 | 11       |
| 2       | 2 | 3 | 3 | 3 | 2 | 2 | 1 | 2 | 3 | 2  | 3  | 2  | 2  | 3  | 3  | 2  | 1  | 2  | 2  | 1 | 12       |
| 15      | 2 | 3 | 3 | 3 | 2 | 2 | 2 | 2 | 2 | 2  | 2  | 1  | 2  | 3  | 3  | 2  | 3  | 2  | 2  | 1 | 13       |
| 4       | 3 | 2 | 1 | 3 | 2 | 2 | 2 | 1 | 3 | 3  | 1  | 2  | 1  | 3  | 2  | 2  | 2  | 2  | 1  | 2 | 14       |
| 16      | 3 | 2 | 2 | 3 | 2 | 2 | 2 | 2 | 3 | 2  | 2  | 2  | 2  | 3  | 3  | 2  | 2  | 2  | 2  | 1 | 15       |
| 5       | 3 | 2 | 2 | 3 | 2 | 2 | 2 | 2 | 3 | 2  | 2  | 2  | 2  | 3  | 3  | 2  | 2  | 2  | 2  | 2 | 16       |
| 8       | 3 | 2 | 2 | 3 | 2 | 2 | 2 | 2 | 3 | 2  | 2  | 2  | 2  | 3  | 3  | 2  | 2  | 2  | 2  | 2 |          |
| 10      | 3 | 2 | 2 | 3 | 2 | 2 | 2 | 2 | 3 | 2  | 2  | 2  | 2  | 3  | 3  | 2  | 2  | 2  | 2  | 2 |          |
| 3       | 3 | 2 | 2 | 3 | 2 | 2 | 2 | 2 | 3 | 2  | 2  | 2  | 2  | 3  | 3  | 2  | 2  | 2  | 2  | 3 | 17       |
| 11      | 3 | 3 | 2 | 3 | 2 | 2 | 1 | 3 | 3 | 2  | 2  | 2  | 2  | 3  | 3  | 2  | 2  | 2  | 2  | 1 | 18       |

Cells with a unique karyotype:  
14 / 25 (56%)

Groups of cells with identical karyotypes:  
18

**b**

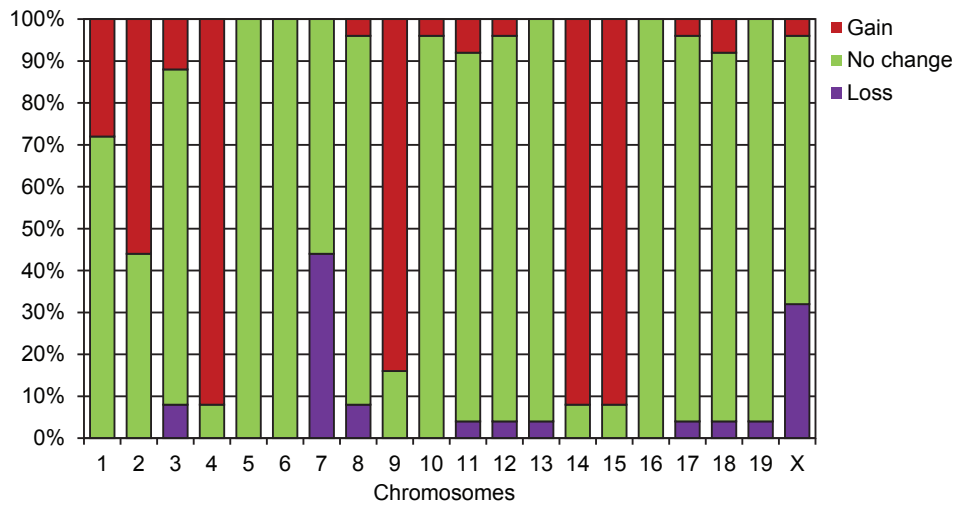

Bakker, Taudt et al, Figure S3
