# Supplementary material for: Single-cell sequencing reveals karyotype heterogeneity in murine and human malignancies
Source: PubMed Central journal article supplement (PMC4888588; doi:10.1186/s13059-016-0971-7), 2016-05-31

Cumulative single-cell seq libraries: T-ALLs

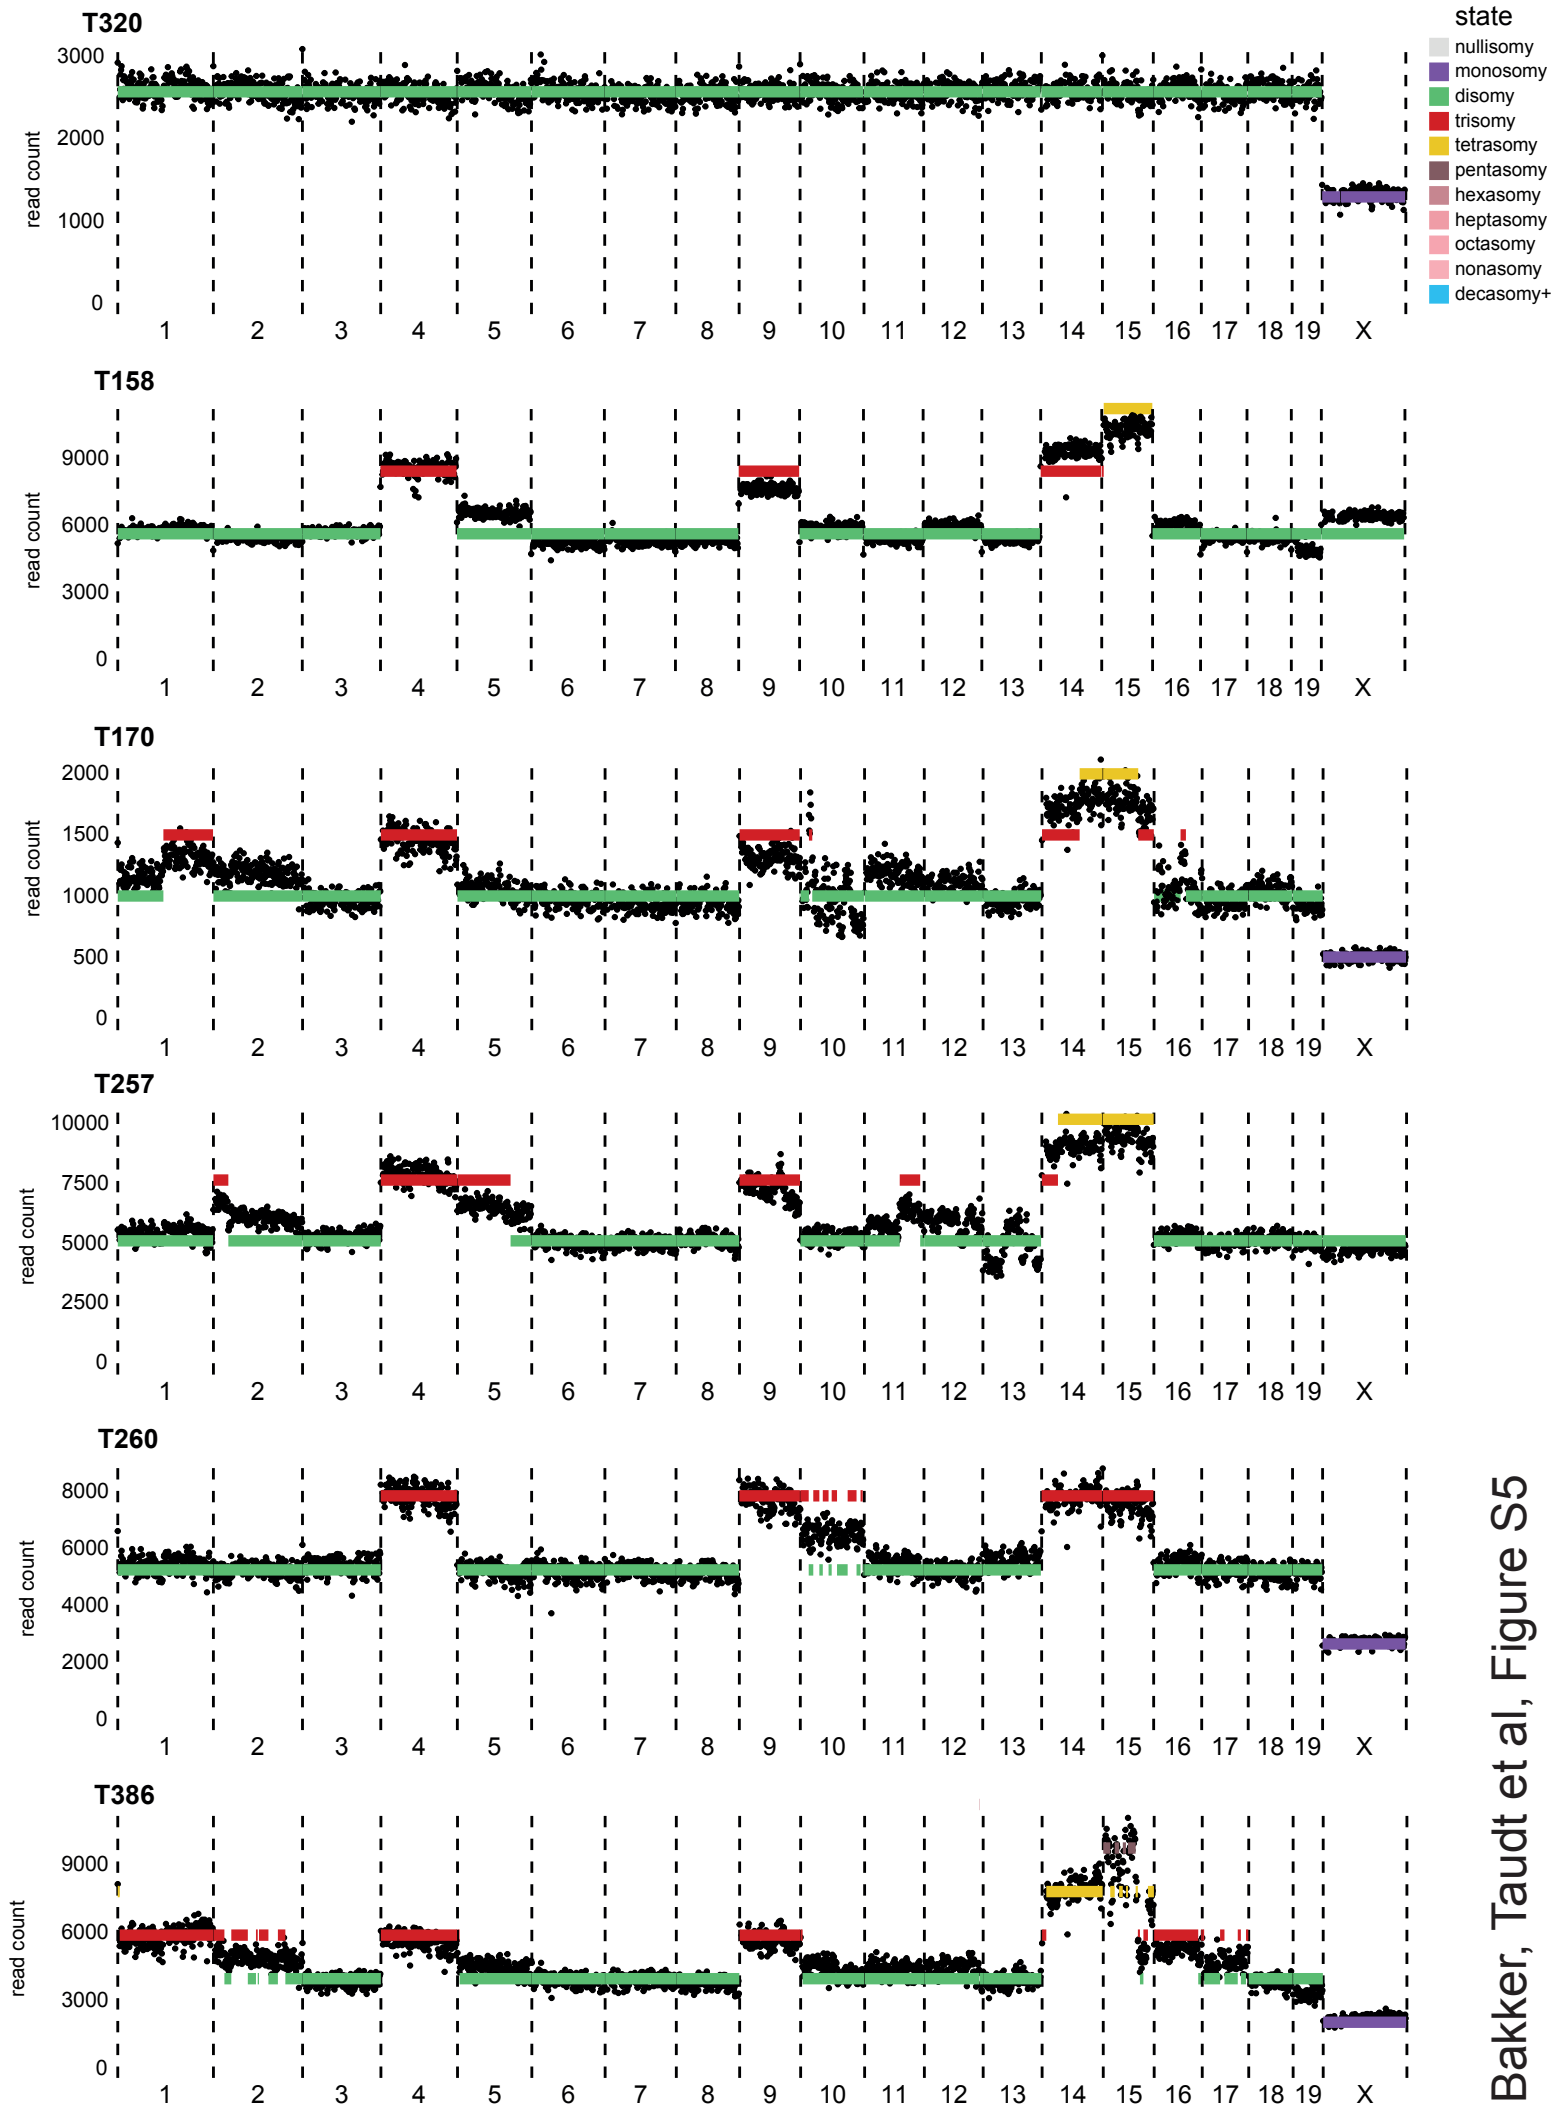

Supplement: 13059_2016_971_MOESM8_ESM.pdf [file 13059_2016_971_MOESM8_ESM.pdf]
